# Supplementary material
Source: Elsevier journal article supplement (https://www.sciencedirect.com/science/article/pii/S012181232030058X)
Supplement: mmc1 [file S012181232030058X:mmc1.docx]

**Supplementary tables**

**Supplementary table 1**. Multivariate analysis of variables associated with prescriptions with an anticholinergic load of 1 or more points according to the ADS scale in patients with Sjögren syndrome, Colombia.

| **Variables** | **Sig.** | **OR** | **CI 95%** | |
| --- | --- | --- | --- | --- |
| **Lower** | **Upper** |
| Woman | <0,001 | 1.264 | 1.160 | 1.376 |
| Age <40 years |  | Reference | Reference | Reference |
| Age 40-64 years | 0.518 | 1.062 | 0.885 | 1.275 |
| Age 65-74 years | 0.941 | 0.993 | 0.822 | 1.199 |
| Age 75-84 years | 0.099 | 1.180 | 0.969 | 1.437 |
| Age ≥ 85 years | 0.008 | 1.352 | 1.081 | 1.690 |
| No comorbidities |  | Reference | Reference | Reference |
| 1-2 comorbidities | <0,001 | 1.711 | 1.504 | 1.946 |
| 3-4 comorbidities | <0,001 | 2.119 | 1.703 | 2.637 |
| ≥ 5 comorbidities | 0.040 | 1.556 | 1.021 | 2.371 |
| Cali | 0.627 | 0.977 | 0.890 | 1.073 |
| Bogota | <0,001 | 0.740 | 0.665 | 0.823 |
| Barranquilla | 0.218 | 1.088 | 0.951 | 1.245 |
| Buga | 0.006 | 1.244 | 1.064 | 1.454 |
| Monteria | 0.090 | 0.844 | 0.695 | 1.027 |
| Manizales | 0.829 | 1.025 | 0.821 | 1.279 |
| Psychiatric disease | <0,001 | 3.567 | 2.977 | 4.274 |
| Neurological disease | <0,001 | 2.498 | 2.093 | 2.981 |
| Rheumatological disease | <0,001 | 2.389 | 2.115 | 2.698 |
| Cardiovascular disease | <0,001 | 1.490 | 1.351 | 1.642 |
| Respiratory disease | <0,001 | 2.208 | 1.772 | 2.751 |
| Cancer | 0.002 | 1.597 | 1.188 | 2.146 |
| Digestive disease | <0,001 | 1.502 | 1.262 | 1.786 |
| Endocrine disease | 0.003 | 1.161 | 1.051 | 1.283 |
| Urinary disease | <0,001 | 1.513 | 1.269 | 1.804 |
| Chronic kidney disease | <0,001 | 1.584 | 1.366 | 1.836 |
| Chronic pain | <0,001 | 2.855 | 2.167 | 3.763 |

ADS: Anticholinergic Drug Scale; Sig: Statistical significance; OR: Odds Ratio; CI: Confidence Interval.

**Supplementary table 2**. Multivariate analysis of variables associated with prescriptions with an anticholinergic load of 1 or more points according to the ACB scale in patients with Sjögren syndrome, Colombia.

| **Variables** | **Sig.** | **OR** | **CI 95%** | |
| --- | --- | --- | --- | --- |
| **Lower** | **Upper** |
| Woman | <0,001 | 1.248 | 1.146 | 1.358 |
| Age <40 years |  | Reference | Reference | Reference |
| Age 40-64 years | 0.161 | 1.146 | 0.947 | 1.388 |
| Age 65-74 years | 0.017 | 1.268 | 1.043 | 1.543 |
| Age 75-84 years | <0,001 | 1.675 | 1.367 | 2.053 |
| Age ≥ 85 years | <0,001 | 1.895 | 1.506 | 2.385 |
| No comorbidities |  | Reference | Reference | Reference |
| 1-2 comorbidities | <0,001 | 1.889 | 1.658 | 2.153 |
| 3-4 comorbidities | <0,001 | 2.357 | 1.893 | 2.936 |
| ≥ 5 comorbidities | 0.017 | 1.673 | 1.095 | 2.554 |
| Cali | 0.306 | 0.952 | 0.865 | 1.046 |
| Bogota | <0,001 | 0.744 | 0.668 | 0.829 |
| Barranquilla | 0.003 | 1.227 | 1.072 | 1.406 |
| Buga | 0.037 | 1.184 | 1.011 | 1.388 |
| Monteria | 0.668 | 0.958 | 0.789 | 1.164 |
| Manizales | 0.772 | 1.034 | 0.827 | 1.292 |
| Valledupar | 0.015 | 1.373 | 1.065 | 1.772 |
| Popayan | 0.002 | 0.613 | 0.447 | 0.840 |
| Psychiatric disease | <0,001 | 3.843 | 3.191 | 4.628 |
| Neurological disease | <0,001 | 2.076 | 1.739 | 2.478 |
| Rheumatological disease | <0,001 | 2.032 | 1.798 | 2.297 |
| Cardiovascular disease | <0,001 | 1.941 | 1.761 | 2.139 |
| Respiratory disease | <0,001 | 1.485 | 1.193 | 1.848 |
| Cancer | 0.246 | 1.193 | 0.885 | 1.608 |
| Digestive disease | <0,001 | 1.555 | 1.306 | 1.850 |
| Endocrine disease | 0.007 | 1.146 | 1.037 | 1.265 |
| Urinary disease | <0,001 | 1.626 | 1.362 | 1.941 |
| Chronic kidney disease | <0,001 | 1.687 | 1.453 | 1.959 |
| Chronic pain | <0,001 | 2.275 | 1.735 | 2.983 |

ACB: Anticholinergic Cognitive Burden Scale; Sig: Statistical significance; OR: Odds Ratio; CI: Confidence Interval.

**Supplementary table 3**. Multivariate analysis of variables associated with prescriptions with an anticholinergic load of 1 or more points according to the ARS scale in patients with Sjögren syndrome, Colombia.

| **Variables** | **Sig.** | **OR** | **CI 95%** | |
| --- | --- | --- | --- | --- |
| **Lower** | **Upper** |
| Woman | <0,001 | 1.317 | 1.199 | 1.446 |
| Age <40 years |  | Reference | Reference | Reference |
| Age 40-64 years | 0.049 | 1.222 | 1.001 | 1.492 |
| Age 65-74 years | 0.089 | 1.195 | 0.973 | 1.468 |
| Age 75-84 years | 0.076 | 1.215 | 0.980 | 1.506 |
| Age ≥ 85 years | 0.082 | 1.240 | 0.973 | 1.581 |
| No comorbidities |  | Reference | Reference | Reference |
| 1-2 comorbidities | <0,001 | 1.404 | 1.230 | 1.602 |
| 3-4 comorbidities | 0.001 | 1.453 | 1.166 | 1.812 |
| ≥ 5 comorbidities | 0.521 | 1.140 | 0.763 | 1.704 |
| Cali | <0,001 | 1.190 | 1.083 | 1.309 |
| Bogota | 0.001 | 0.824 | 0.738 | 0.921 |
| Tulua | 0.026 | 0.828 | 0.701 | 0.978 |
| Monteria | 0.333 | 0.902 | 0.733 | 1.111 |
| Manizales | 0.768 | 0.966 | 0.767 | 1.217 |
| Sincelejo | <0,001 | 0.576 | 0.430 | 0.773 |
| Popayan | 0.002 | 0.559 | 0.388 | 0.806 |
| Psychiatric disease | <0,001 | 5.200 | 4.378 | 6.177 |
| Neurological disease | <0,001 | 2.199 | 1.855 | 2.606 |
| Rheumatological disease | <0,001 | 1.447 | 1.276 | 1.640 |
| Cardiovascular disease | 0.010 | 1.144 | 1.033 | 1.267 |
| Respiratory disease | <0,001 | 1.665 | 1.339 | 2.070 |
| Cancer | 0.008 | 1.509 | 1.111 | 2.050 |
| Digestive disease | <0,001 | 1.719 | 1.444 | 2.047 |
| Endocrine disease | 0.150 | 1.080 | 0.973 | 1.200 |
| Urinary disease | <0,001 | 2.212 | 1.854 | 2.640 |
| Human immunodeficiency virus | 0.037 | 2.353 | 1.054 | 5.253 |
| Chronic pain | 0.039 | 1.313 | 1.013 | 1.702 |

AR.S: Anticholinergic Risk Scale; Sig: Statistical significance; OR: Odds Ratio; CI: Confidence Interval.
